# Supplementary material for: 13H-benzo[6-7]indolo[3,2-c]quinolines (B[6,7]IQ): optimization of their DNA triplex-specific stabilization properties
Source: Royal Society of Chemistry journal article supplement (doi:10.1039/b001318h), 2000-01-01
Supplement: b001318h.doc [file b001318h.doc]

# SUPPLEMENTARY MATERIAL

**EXPERIMENTAL**

**N-[(Quinolin-2(1*H*)-one)-4-yl]-N’-[1-(7-nitro-1,2,3,4-tetrahydronaphthylidene)]hydrazine (8a)**.To a solution of 7.14 g (40.8 mmol) of 4-hydrazinoquinolin-2(1*H*)-one **7** in 1.4 L of glacial acetic acid under stirring was dropwise added under nitrogen 8.54 g (44.8 mmol) of 7-nitro-1-tetralone in 200 mL of the same solvent. Stirring was kept overnight. The thus obtained suspension of microcrystalline material was then filtered and the solid washed several times with ethanol. Drying under vaccum yields 14.1 g (99%)of the expected product. 1H NMR (200 MHz, [D6]DMSO, 25ºC):  = 11.23 (s br, 1H, NH), 9.52 (s br, 1H, NH), 8.90 (d, 4*J*(H,H) = 2.5 Hz, 1H), 8.14 (m, 2H), 7.55 (m, 2H), 7.34 (d, 3*J*(H,H) = 8.2 Hz, 1H), 7.19 (m, 1H), 6.38 (s br, 1H), 2.99 (m, 4H), 1.96 (m, 2H). C,H,N analysis (C19H16N4O3): calc.: C 65.51, H 4.62, N 16.08; found: C 65.21, H 5.01, N 16.19.

**11-Nitro-5*H*,13*H*-benzo[6,7]indolo[3,2-*c*]quinolin-6-one (9a).** A mixture of 4 g (11.5 mmol) of hydrazone **8a** obtained above in 300 mL of diphenyl ether was heated on reflux for 4.5 h while nitrogen was bubbled through the solution. The reaction mixture was then left on cooling, added with an equal volume of pentane and stirred a few minutes. The thus obtained suspension was filtered and the solid washed repeatedly with hexane and dried *in vacuo* to yield 2.94 g (77 %) of a red material which corresponds to 7,8-dihydrobenzoindoloquinolone intermediate**.** An analytical sample was obtained from recrystallization in DMF. 1H NMR (200 MHz, [D6]DMSO, 25ºC):  = 12.64 (s br, 1H, NH), 11.26 (s br, 1H, NH), 8.65 (d, 4*J*(H,H) = 2.1 Hz, 1H), 8.17 (d, 3*J*(H,H) = 7.8 Hz, 1H), 8.05 (dd, 4*J*(H,H) = 2.1 Hz, 3*J*(H,H) = 8.2 Hz, 1H), 7.59 (d, 3*J*(H,H) = 8.2 Hz, 1H), 7.40 (m, 2H), 7.29 (m, 1H), 3.15 (m, 4H). C,H,N analysis (C19H13N3O3.1/6 DMF): calc.: C 68.18, H 4.16, N 12.91; found: C 68.38, H 4.03, N 12.70.

To a solution of 2 g (6 mmol) of 11-nitrodihydrobenzoindoloquinolone obtained above in 100 mL of DMF at 140ºC under stirring was slowly added a solution of 1.37 g of DDQ in 20 mL of DMF. Stirring was kept for 2 h and the solvent was removed under reduced pressure and the residue was repeatedly washed with acetone and dried *in vacuo* to yield 1.80 g (90%) of **9a**. An analytical sample was obtained by recrystallization in acetic acid. 1H NMR (200 MHz, [D6]DMSO, 25ºC):  = 13.53 (s br, 1H, NH), 11.65 (s br, 1H, NH), 9.76 (s, 1H), 8.58 (d, 3*J*(H,H) = 8.6 Hz, 1H), 8.42 (d, 3*J*(H,H) = 7.9 Hz, 1H), 8.33 (m, 2H), 7.95 (d, 3*J*(H,H) = 8.6 Hz, 1H), 7.41-7.49 (m, 3H). C,H,N analysis (C19H11N3O3.1/10 AcOH): calc.: C 68.77, H 3.43, N 12.53; found: C 68.83, H 3.83, N 12.69.

**6-Chloro-11-nitro-13*H*-benzo[6,7]indolo[3,2-*c*]quinoline (10a).** To mixture of 60 mg of benzoindoloquinolin-6-one **9a** (0.18 mmol), 3 mL of dry acetonitrile, benzyltriethylammonium chloride (166 mg, 0.73 mmol) and *N*,*N*-diethylaniline (105 mg, 0.70 mmol) in a dry atmosphere was added under stirring 140 mg of phosphorous oxychloride (0.91 mmol). The reaction mixture was heated at reflux for 48 h, left on cooling, poured into 30 mL of ice and stirred at room temperature for 2 h. The thus obtained solid was filtered, suspended in 25 mL of dilute ammonia under stirring, filtered and washed repeatdly with water. Drying *in vacuo* yields a material suitable for the next step of transformation (60 mg, 95%). An analytical sample of brown-orange needles was obtained by recrystallisation in DMSO. 1H NMR (200 MHz, [D6]DMSO, 25ºC):  = 14.05 (s br, 1H, NH), 9.88 (s, 1H), 8.78 (m, 2H), 8.41 (m, 2H), 8.02 (m, 2H), 7.89 (m, 2H). C,H,N analysis (C19H10Cl1N3O3.1/6 DMSO): calc.: C 64.36, H 3.07, N 11.65; found: C 64.16, H 3.21, N 11.83.

**6-[[3-(Dimethylamino)propyl]amino]-11-nitro-13*H*-benzo[6,7]indolo[3,2-*c*]quinoline (1) and 11-amino-6-[[3-(dimethylamino)propyl]amino]-13*H*-benzo[6,7]indolo[3,2-*c*]quinoline (2).** A solution of 200 mg of 6-Chloro-11-nitro-13*H*-benzo[6,7]indolo[3,2-*c*]quinoline **10a** in 3 mL of 3-dimethylaminopropylamine (large excess) was heated to reflux under nitrogen for 3h. The crude mixture was then evaporated to dryness and added with chloroform. The organic layer was then washed successively with dilute ammonia and water and dried over magnesium sulfate. The chloroform fraction was then concentrated to dryness and the thus obtained crude material was chromatographied on a neutral alunina column using dichloromethane-methanol (96/4,v/v) as eluent giving i)6-[[3-(dimethylamino)-propyl]amino]-11-nitro-13*H*-benzo[6,7]indolo[3,2-*c*]quinoline **(1)** (35mg,15% yield). 1H NMR (200 MHz, [D6]DMSO, 25ºC):  = 13.48 (s br, 1H, NH), 9.89 (s, 1H), 8.71 (d, 3*J*(H,H) = 8.6 Hz, 1H), 8.50 (d, 3*J*(H,H) = 7.9 Hz, 1H), 8.35 (m, 2H), 8.03 (d, 3*J*(H,H) = 8.6 Hz, 1H), 7.74 (d, 3*J*(H,H) = 8.2 Hz, 1H), 7.59 (m, 1H), 7.40 (m, 2H), 3.80 (m, 2H, CH2), 2.54 (m, 2H, CH2), 2.34 (s, 6H, CH3), 1.97 (m, 2H, CH2). C,H,N analysis (C24H23N5O2.1/5 MeOH): calc.: C 69.22, H 5.71, N 16.67; found: C 69.14, H 5.51, N 16.54 and ii) 11-amino-6-[[3-(dimethylamino)-propyl]amino]-13*H*-benzo[6,7]indolo[3,2-*c*]quinoline **(2).** (20mg,9% yield). 1H NMR (200 MHz, [D6]DMSO, 25ºC):  = 12.71 (s br, 1H, NH), 8.55 (d, 3*J*(H,H) = 7.3 Hz, 1H), 8.03 (d, 3*J*(H,H) = 8.7 Hz, 1H), 7.78 (d, 3*J*(H,H) = 8.4 Hz, 1H), 7.67 (m, 2H), 7.55 (m, 2H), 7.35 (m, 1H), 7.17 (s br, 1H, NH), 7.01 (d, 3*J*(H,H) = 7.0 Hz, 1H), 5.53 (s br, 2H, NH2), 3.82 (m, 2H, CH2), 2.64 (m, 2H, CH2), 2.41 (s, 6H, CH3), 1.98 (m, 2H, CH2).

**N-[(Quinolin-2(1*H*)-one)-4-yl]-N’-[1-(6-acetamido-1,2,3,4-tetrahydronaphthylidene)]hydrazine (8b).** To a solution of 1.96 g (11.2 mmol) of 4-hydrazinoquinolin-2(1*H*)-one **7** in 250 mL of glacial acetic acid under stirring was dropwise added under nitrogen 2.5 g (12.3 mmol) of 6-acetamido-1-tetralone **6b** in 20 mL of the same solvent. Stirring was kept overnight. The thus obtained suspension of microcrystalline material was then filtered and the solid washed several times with water and acetone. Drying under vaccum yields 3.16 g (78%)of the expected product. 1H NMR (200 MHz, [D6]DMSO, 25ºC):  = 11.08 (s br, 1H, NH), 10.07 (s br, 1H, NH), 9.25 (s, 1H, NH), 8.08 (m, 1H), 7.61 (d, 3*J*(H,H) = 7.3 Hz, 1H), 7.42 (d, 3*J*(H,H) = 6.7 Hz, 1H), 7.31 (d, 3*J*(H,H) = 7.9 Hz, 1H), 7.19 (m, 1H), 6.32 (s, 1H), 2.92 (m, 2H, CH2), 2.80 (m, 2H, CH2), 2.09 (s, 3H, CH3), 1.92 (m, 2H, CH2). C,H,N analysis (C21H20N4O2.H2O): calc.: C 66.65, H 5.86, N 14.80; found: C 66.79, H 6.10, N 14.92.

**10-Acetamido-5*H*,13*H*-benzo[6,7]indolo[3,2-*c*]quinolin-6-one (9b).** A mixture of 2 g (5.55 mmol) of hydrazone **8b** in 200 mL of diphenyl ether under nitrogen was heated on reflux for 2 h, added with 400 mg of Pd/C (10%) and left under reflux for a further 2 h. The reaction mixture was then left on cooling overnight, added with an equal volume of pentane and stirred a few minutes. The thus obtained suspension was filtered, the solid washed repeatedly with hexane and extracted twice with 50 mL of boiling DMF. The filtered solution was added with methanol until precipitation to occur. The solid was filtered, washed with methanol and dried *in vacuo* to yield 1.45 g (77 %) of the expected material. 1H NMR (200 MHz, [D6]DMSO, 25ºC):  = 12.99 (s br, 1H, NH), 11.52 (s br, 1H, NH), 10.24 (s br, 1H, NH), 8.60 (d, 3*J*(H,H) = 8.8 Hz, 1H), 8.43 (d, 3*J*(H,H) = 7.7 Hz, 1H), 8.33 (m, 2H), 7.88 (d, 3*J*(H,H) = 8.8 Hz, 1H), 7.66 (d, 3*J*(H,H) = 8.7 Hz, 1H), 7.53 (m, 2H), 7.38 (m, 1H), 2.17 (s, 3H, CH3). C,H,N analysis (C21H15N3O2.1/4 DMF): calc.: C 72.63, H 4.69, N 12.65; found: C 72.40, H 4.56, N 12.32.

**10-Acetamido-6-Chloro-13*H*-benzo[6,7]indolo[3,2-*c*]quinoline (10b).** To mixture of 1.2 g of 10-acetamidobenzoindoloquinolin-6-one (3.52 mmol), 75 mL of dry acetonitrile, benzyltriethylammonium chloride (3.22 g, 14.14 mmol) and *N*,*N*-diethylaniline (2.02 g, 13.5 mmol) in a dry atmosphere was added under stirring 2.70 g of phosphorous oxychloride (17.6 mmol). The reaction mixture was heated at reflux for 24 h, left on cooling, poured into 500 mL of ice and stirred at room temperature for 2 h. The thus obtained solid was filtered, suspended in dilute ammonia under stirring, filtered and washed repeatdly with water. Drying *in vacuo* yields 1.08 g (86%) of **10b**. 1H NMR (200 MHz, [D6]DMSO, 25ºC):  = 13.55 (s br, 1H, NH), 10.33 (s, 1H), 8.76 (m, 2H), 8.50 (m, 2H), 8.12 (m, 1H), 7.85 (m, 4H), 2.19 (s, 3H, CH3). C,H,N analysis (C21H14Cl1N3O1.H2O): calc.: C 67.02, H 4.59, N 11.39; found: C 66.76, H 4.27, N 11.12.

**10-Amino-6-[[3-(dimethylamino)propyl]amino]-13*H*-benzo[6,7]indolo[3,2-*c*]quinoline (3).** A solutionof 10-acetamido-6-chlorobenzoindoloquinoline **10b** in 4 mL of 3-dimethylaminopropylamine was heated to reflux under nitrogen for 18h. The mixture was then evaporated to dryness and added with chloroform. The organic layer was then washed successively with dilute ammonia and water and dried over magnesium sulfate. Evaporation of the solvent furnished the titled compound (40mg,75% yield). 1H NMR (200 MHz, [D6]DMSO, 25ºC):  = 12.60 (s br, 1H, NH), 8.45 (m, 2H), 8.19 (d, 3*J*(H,H) = 8.7 Hz, 1H), 7.69 (d, 3*J*(H,H) = 8.7 Hz, 1H), 7.40 (m, 2H), 7.14 (m, 1H), 7.10 (m, 3H), 5.43 (s br, 2H, NH2), 3.79 (m, 2H, CH2), 2.54 (m, 2H, CH2), 2.32 (s, 6H, CH3), 1.96 (m, 2H, CH2). C,H,N analysis (C24H25N5.H2O): calc.: C 71.79, H 6.56, N 17.62; found: C 71.79, H 6.77, N 17.44.

**N-[(Quinolin-2(1*H*)-one)-4-yl]-N’-[1-(7-methoxy-1,2,3,4-tetrahydronaphthylidene)]hydrazine (8c)**. To a solution of 4.0 g (22.9 mmol) of 4-hydrazinoquinolin-2(1*H*)-one **7** in 500 mL of glacial acetic acid under stirring was dropwise added under nitrogen 4.43 g (25.1 mmol) of 7-methoxy-1-tetralone in 25 mL of the same solvent. Stirring was kept for 36 hours. The thus obtained suspension of microcrystalline material was then filtered and the solid washed several times with ethanol. Drying under vaccum yields 6.25 g (82%)of the expected product. 1H NMR (200 MHz, [D6]DMSO, 25ºC):  = 11.16 (s br, 1H, NH), 9.32 (s br, 1H, NH), 8.09 (d, 3*J*(H,H) = 7.9 Hz, 1H), 7.66 (d, 4*J*(H,H) = 2.6 Hz, 1H), 7.55 (m, 1H), 7.33 (d, 3*J*(H,H) = 7.7 Hz, 1H), 7.20 (m, 2H), 6.95 (dd, 3*J*(H,H) = 8.4 Hz, 4*J*(H,H) = 2.7 Hz, 1H), 6.33 (s, 1H), 3.84 (s, 3H, CH3), 2.93 (m, 2H, CH2), 2.77 (m, 2H, CH2), 1.91 (m, 2H, CH2). C,H,N analysis (C20H19N3O2): calc.: C 72.05, H 5.74, N 12.57; found: C 71.81, H 6.04, N 12.57.

**11-Methoxy-5*H*,13*H*-benzo[6,7]indolo[3,2-*c*]quinolin-6-one (9c)** A mixture of 3 g (9.0 mmol) of hydrazone **8c** in 300 mL of diphenyl ether under nitrogen was heated on reflux for 3.5 h, cooled to 150 ºC, added with 600 mg of Pd/C (10%) and brought to reflux for a further 1h. The reaction mixture was then left on cooling overnight, added with an equal volume of pentane and stirred a few minutes. The thus obtained suspension was filtered, the solid washed repeatedly with hexane and extracted twice with 50 mL of hot DMF. The filtered solution was added with water (400 mL) until precipitation to occur. The solid was filtered, washed with ethanol-water and dried *in vacuo* to yield 2.15 g (76 %) of the expected material. 1H NMR (200 MHz, [D6]DMSO, 25ºC):  = 12.89 (s br, 1H, NH), 11.52 (s br, 1H, NH), 8.41 (d, 3*J*(H,H) = 7.8 Hz, 1H), 8.19 (d, 3*J*(H,H) = 8.5 Hz, 1H), 8.12 (s, 1H), 8.00 (d, 3*J*(H,H) = 8.9 Hz, 1H), 7.70 (d, 3*J*(H,H) = 8.5 Hz, 1H), 7.53 (m, 2H), 7.39 (m, 1H), 7.23 (d, 3*J*(H,H) = 8.9 Hz, 1H), 4.06 (s, 3H, CH3). C,H,N analysis (C20H14N2O2.1/3 H2O): calc.: C 74.99, H 4.61, N 8.74; found: C 75.18, H 4.99, N 8.87.

**6-Chloro-11-methoxy-13*H*-benzo[6,7]indolo[3,2-c]quinoline (10c).** To mixture of 1.5 g of 11-methoxy-5*H*,13*H*-benzo[6,7]indolo[3,2-c]quinolin-6-one **9c** (4.77 mmol), 100 mL of dry acetonitrile, benzyltriethylammonium chloride (4.35 g, 19.1 mmol) and *N*,*N*-diethylaniline (2.82 g, 52.9 mmol) in a dry atmosphere was added under stirring 3.66 g of phosphorous oxychloride (23.9 mmol). The reaction mixture was heated at reflux overnight, added with an excess of phosphorous oxychloride (10 mL) and kept at reflux a further 6 h. The reaction medium was then left on cooling, poured into 500 mL of ice and stirred at room temperature for 2 h. The thus obtained solid was filtered, suspended in dilute ammonia under stirring, filtered and washed repeatedly with water. Drying *in vacuo* yields 1.26 g (79%) of **9c**. 1H NMR (200 MHz, [D6]DMSO, 25ºC):  = 13.44 (s br, 1H, NH), 8.80 (m, 1H), 8.41 (d, 3*J*(H,H) = 8.7 Hz, 1H), 8.25 (d, 4*J*(H,H) = 2.4 Hz, 1H), 8.12 (m, 2H), 7.85 (m, 3H), 7.35 (dd, 3*J*(H,H) = 8.9 Hz, 4*J*(H,H) = 2.4 Hz, 1H), 4.10 (s, 3H, CH3). C,H,N analysis (C20H13Cl1N2O1.1/3 EtOH): calc.: C 71.29, H 4.34, N 8.04; found: C 71.65, H 4.67, N 8.23.

**6-[[3-(Dimethylamino)propyl]amino]-11-methoxy-13*H*-benzo[6,7]indolo[3,2-*c*]quinoline (4).** According to the procedure described above for the compound **3,** the reaction of 6-chloro-11-methoxy-13*H*-benzo[6,7]indolo[3,2-*c*]quinoline **10c** with 3-dimethylaminopropylamine yields the titled product **4** in 64% yield. 1H NMR (200 MHz, [D6]DMSO, 25ºC):  = 12.81 (s br, 1H, NH), 8.49 (d, 3*J*(H,H) = 7.4 Hz, 1H), 8.27 (d, 3*J*(H,H) = 8.6 Hz, 1H), 8.22 (s, 1H), 8.03 (d, 3*J*(H,H) = 9.0 Hz, 1H), 7.75 (m, 2H), 7.54 (m, 1H), 7.28 (m, 3H), 4.07 (s, 3H, CH3), 3.81 (m, 2H, CH2), 2.54 (m, 2H, CH2), 2.33 (s, 6H, CH3), 1.95 (m, 2H, CH2). C,H,N analysis (C25H26N4O1): calc.: C 75.35, H 6.58, N 14.06; found: C 75.03, H 6.89, N 13.87.
